# Supplementary material for: flowCore: a Bioconductor package for high throughput flow cytometry
Source: Springer Nature journal article supplement (doi:10.1186/1471-2105-10-106), 2009-04-09
Supplement: 12859_2009_2836_MOESM1_ESM.pdf [file 12859_2009_2836_MOESM1_ESM.pdf]

# IMPORT

# STRUCTURES

# METHODS

# OUTPUT

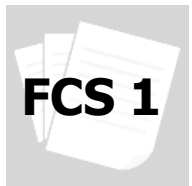

FCS 1

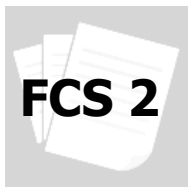

FCS 2

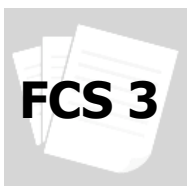

FCS 3

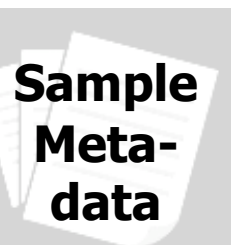

Sample  
Meta-  
data

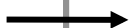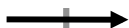

**flowSet**

**flowFrame 1**

**flowFrame 2**

**flowFrame 3**

...

**phenoData**

|    | Age | Sex | Time |
|----|-----|-----|------|
| f1 | 41  | m   | 1    |
| f2 | 44  | f   | 1    |
| f3 | 41  | m   | 2    |

**compensate**  
**transform**  
**filter**  
**subset**

...

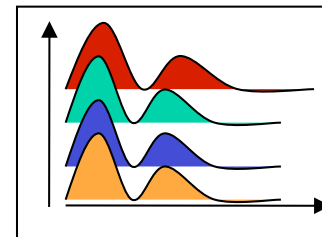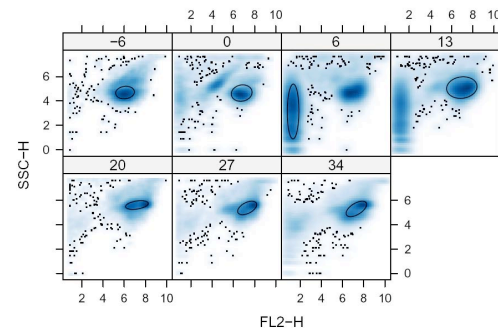

```
> summary(filt)
```

```
Pop1: 1236 of 10000 (12.36%)
```

```
Pop2: 6996 of 10000 (69.96%)
```

```
Pop3: 1768 of 10000 (17.68%)
```
