# Supplementary material for: flowCore: a Bioconductor package for high throughput flow cytometry
Source: Springer Nature journal article supplement (doi:10.1186/1471-2105-10-106), 2009-04-09

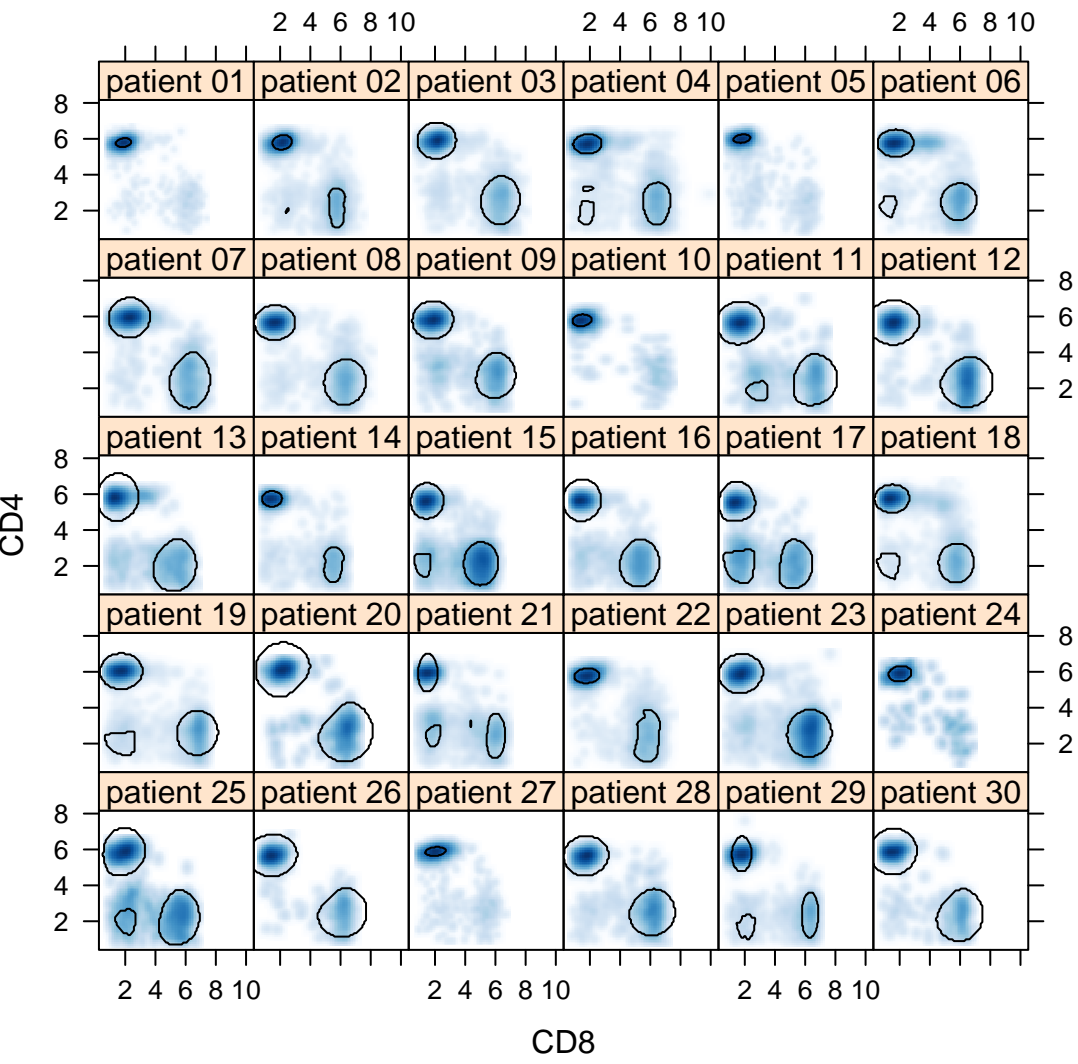

Supplement: 12859_2009_2836_MOESM3_ESM.pdf [file 12859_2009_2836_MOESM3_ESM.pdf]
